# Supplementary material
Source: PubMed Central journal article supplement (PMC7965289)
Supplement: 14-01016.pdf [file 14-01016.pdf]

**On-line Table: Texture parameters differentiating between HPV-positive and HPV-negative primary oropharyngeal squamous cell carcinomas**

| Texture Feature Type | HPV+       |           | HPV-       |            | P Value           | Q Value            |
|----------------------|------------|-----------|------------|------------|-------------------|--------------------|
|                      | Mean       | SD        | Mean       | SD         |                   |                    |
| Histogram            |            |           |            |            |                   |                    |
| Mean                 | 1079.56    | 46.57     | 1072.7     | 47.46      | .204              | 0.408              |
| Median               | 1113.04    | 16.47     | 1108.86    | 11.63      | .006 <sup>a</sup> | 0.036 <sup>a</sup> |
| SD                   | 283.43     | 58.66     | 288.02     | 56.36      | .492              | 0.66               |
| Entropy              | 4.97       | 0.368     | 5.09       | 0.472      | .016 <sup>a</sup> | 0.048 <sup>a</sup> |
| Second SD            | 25.69      | 24.74     | 26.95      | 25.08      | .66               | 0.66               |
| Range                | 73.49      | 68.71     | 77.23      | 68.75      | .637              | 0.66               |
| Geometric mean       | 862.24     | 101.34    | 849.47     | 102.1      | .278              | 0.695              |
| Harmonic mean        | 206.29     | 76.48     | 194.14     | 70.61      | .16               | 0.695              |
| IQR                  | 63.85      | 105.21    | 67.35      | 101.79     | .771              | 0.771              |
| Fourth moment        | 5.32e10    | 1.43e10   | 5.38e10    | 1.29e10    | .664              | 0.771              |
| Test                 | 0.52       | 0.302     | 0.542      | 0.3        | .535              | 0.771              |
| SD5                  | 24.51      | 20.72     | 25.65      | 21.87      | .636              | 0.882              |
| SD9                  | 27.7       | 51.69     | 26.41      | 22.35      | .733              | 0.882              |
| GLCM                 |            |           |            |            |                   |                    |
| Entropy              | 0.318      | 0.118     | 0.35       | 0.145      | .043 <sup>a</sup> | 0.215              |
| Contrast             | 46.76      | 23.92     | 48.17      | 23.86      | .608              | 0.61               |
| Correlation          | 0.635      | 0.016     | 0.633      | 0.016      | .273              | 0.455              |
| Energy               | 0.172      | 0.049     | 0.163      | 0.072      | .235              | 0.455              |
| Homogeneity          | 0.732      | 0.073     | 0.728      | 0.08       | .61               | 0.61               |
| GLRL                 |            |           |            |            |                   |                    |
| SRE                  | 0.036      | 0.011     | 0.037      | 0.01       | .681              | 0.832              |
| LRE                  | 0.03       | 0.01      | 0.031      | 0.009      | .494              | 0.832              |
| GLN                  | 0.039      | 0.011     | 0.041      | 0.01       | .237              | 0.832              |
| RLN                  | 0.03       | 0.01      | 0.031      | 0.009      | .503              | 0.832              |
| RP                   | 460.89     | 32.15     | 458.92     | 31.05      | .592              | 0.832              |
| LGRE                 | 468.72     | 31.79     | 466.8      | 30.21      | .595              | 0.832              |
| HGRE                 | 449.12     | 26.62     | 444.33     | 23.38      | .108              | 0.832              |
| SRLGE                | 468.3      | 31.45     | 466.52     | 28.31      | .614              | 0.832              |
| SRHGE                | 470.81     | 184.75    | 470.71     | 183.47     | .996              | 0.996              |
| LRLGE                | 579.83     | 238.21    | 563.93     | 248.82     | .567              | 0.832              |
| LRHGE                | 482.73     | 199.21    | 489.38     | 220.25     | .778              | 0.856              |
| Law's features       |            |           |            |            |                   |                    |
| L1                   | 401,821.11 | 325,110.7 | 422,605.05 | 325,602.85 | .581              | 0.882              |
| L2                   | 54,555.47  | 60,864.25 | 58,191.05  | 68,155.05  | .618              | 0.882              |
| L3                   | 17,363.96  | 18,721.23 | 17,640.11  | 15,020.79  | .882              | 0.882              |
| L4                   | 106,067.83 | 96,438.7  | 110,816.02 | 101,029.14 | .675              | 0.882              |
| L5                   | 12,496.82  | 15,684.58 | 12,961.13  | 12,959.07  | .771              | 0.882              |
| L6                   | 6280.85    | 8470.03   | 6478.15    | 6652.15    | .813              | 0.882              |
| L7                   | 7788.3     | 9881.08   | 7957.37    | 7834.28    | .863              | 0.882              |
| L8                   | 7667.9     | 7172.81   | 7838.78    | 5444.25    | .804              | 0.882              |
| L9                   | 47,127.81  | 39,972.47 | 48,634.72  | 33,942.65  | .715              | 0.882              |
| GLGM                 |            |           |            |            |                   |                    |
| MGR                  | 2.54       | 1.24      | 2.5        | 1.29       | .777              | 0.973              |
| VGR                  | 7010.66    | 3189.11   | 6941.28    | 3368.99    | .852              | 0.973              |
| Skewness             | 45.99      | 13.14     | 46.04      | 12.49      | .973              | 0.973              |
| Kurtosis             | 2402.82    | 1459.38   | 2389.66    | 1355.96    | .936              | 0.973              |

**Note:**—GLN indicates gray-level nonuniformity; SRE, short-run emphasis; LRE, long-run emphasis; RLN, run-length nonuniformity; RP, run percentage; LGRE, low gray-level run emphasis; HGRE, high gray-level run emphasis; SRLGE, short-run low gray-level emphasis; SRHGE, short-run high gray-level emphasis; LRLGE, long-run low gray-level emphasis; LRHGE, long-run high gray-level emphasis; MGR, mean gradients; VGR, variance of gradients; IQR, interquartile range.

<sup>a</sup> Significant.
